# Supplementary material
Source: Research Square preprint supplement (doi:10.21203/rs.3.rs-8878291/v1)
Supplement: Supplementary file 1 [file 622c30a003ce4879fde0ea39.docx]

**Valorization of Teak Wood Biomass into Nanobiochar for Environmental Remediation**

By

Deshraj Singh Thakur1, *Santosh Narayan Chadar2

1-2 Govt. Auto. Girls P.G. Excellence College Sagar (M.P.)

[dr.santoshnarayan@gmail.com](mailto:dr.santoshnarayan@gmail.com) ; [deshrajthakur117@gmail.com](mailto:deshrajthakur117@gmail.com)

*Corresponding author: E-mail: [dr.santoshnarayan@gmail.com](mailto:dr.santoshnarayan@gmail.com)

Table S1. Adsorption_Performance_of_Nanobiochar

| Metal Ion | Initial Concentration (mg/L) | Run 1 Final (mg/L) | Run 2 Final (mg/L) | Run 3 Final (mg/L) | Mean Final (mg/L) | Standard Deviation |
| --- | --- | --- | --- | --- | --- | --- |
| Pb2+ | 50 | 5.8 | 5.1 | 5.6 | 5.5 | 0.35 |
| Cd2+ | 50 | 7.8 | 7.1 | 7.6 | 7.5 | 0.36 |
| Hg2+ | 20 | 3.9 | 3.3 | 3.6 | 3.6 | 0.3 |
| As5+ | 10 | 2.3 | 2 | 2.4 | 2.2 | 0.21 |

Table S2. Removal_Efficiency_of_Metal_Ions

| Metal Ion | Run 1 (%) | Run 2 (%) | Run 3 (%) | Mean (%) | Standard Deviation |
| --- | --- | --- | --- | --- | --- |
| Pb2+ | 88.4 | 89.8 | 88.8 | 89 | 1.2 |
| Cd2+ | 84.4 | 85.8 | 84.8 | 85 | 1.5 |
| Hg2+ | 80.5 | 83.5 | 82 | 82 | 1.3 |
| As5+ | 77 | 80 | 76 | 78 | 1.4 |

Table S3. Effect_of_Experimental_Conditions_on_Heavy_Metal_Removal

| Metal Ion | Initial Concentration (mg/L) | pH | Contact Time (min) | Adsorbent Dosage (g/L) | Run 1 (%) | Run 2 (%) | Run 3 (%) | Mean (%) | Standard Deviation |
| --- | --- | --- | --- | --- | --- | --- | --- | --- | --- |
| Pb2+ | 50 | 5.5 | 120 | 1 | 88.5 | 89.8 | 88.7 | 89 | 1.2 |
| Cd2+ | 50 | 5 | 120 | 1 | 84.2 | 86.1 | 84.7 | 85 | 1.5 |
| Hg2+ | 20 | 6 | 120 | 1 | 81.1 | 83.3 | 81.6 | 82 | 1.3 |
| As5+ | 10 | 5.8 | 120 | 1 | 77 | 79.2 | 77.8 | 78 | 1.4 |

**
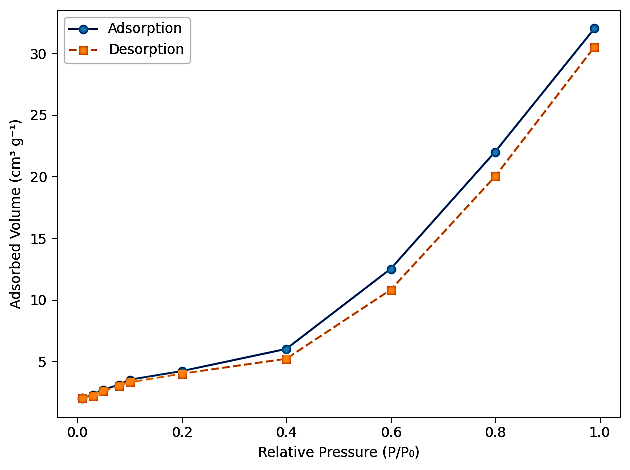
**

**Figure 4.** N₂ adsorption–desorption isotherm of teak wood–derived nano-biochar synthesized at 800-900 °C


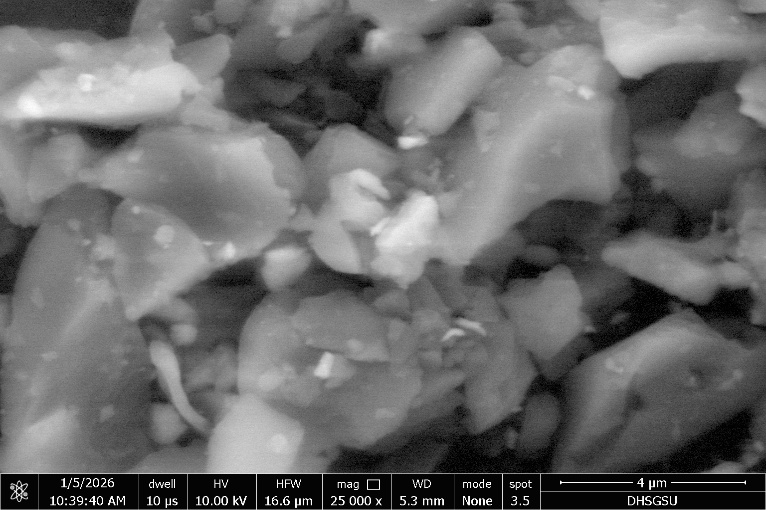

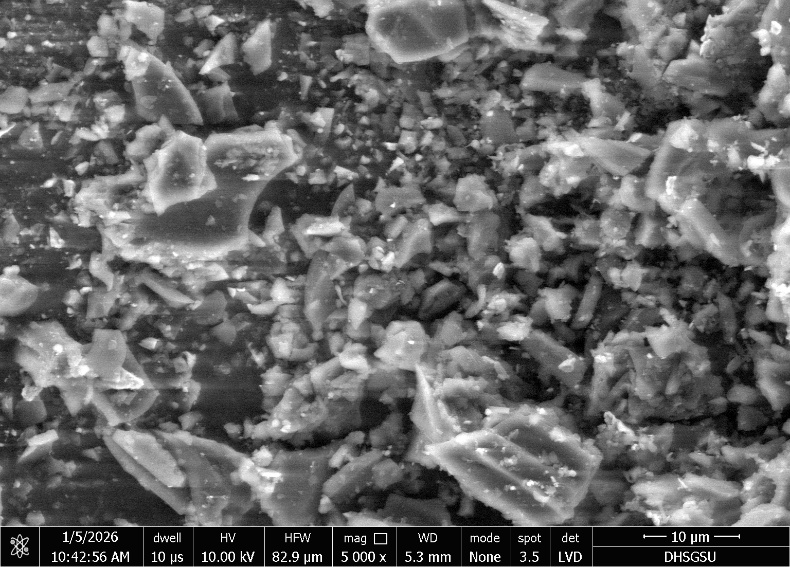

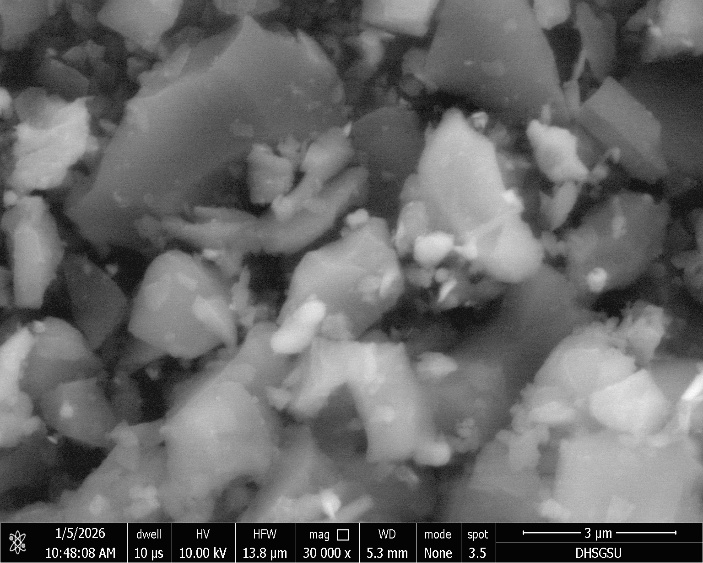

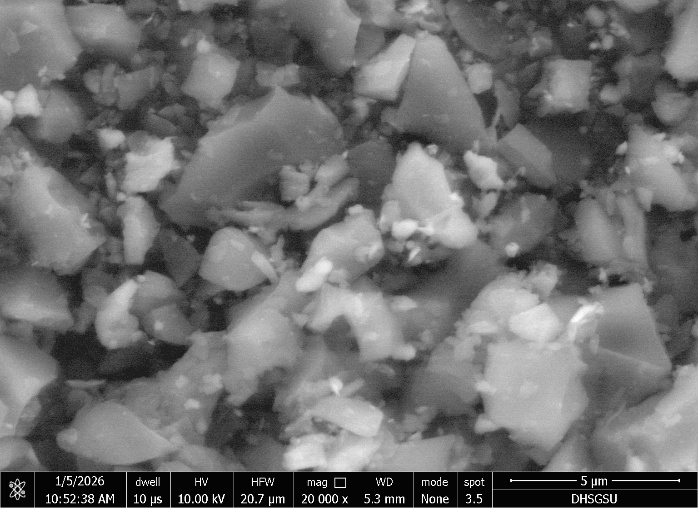

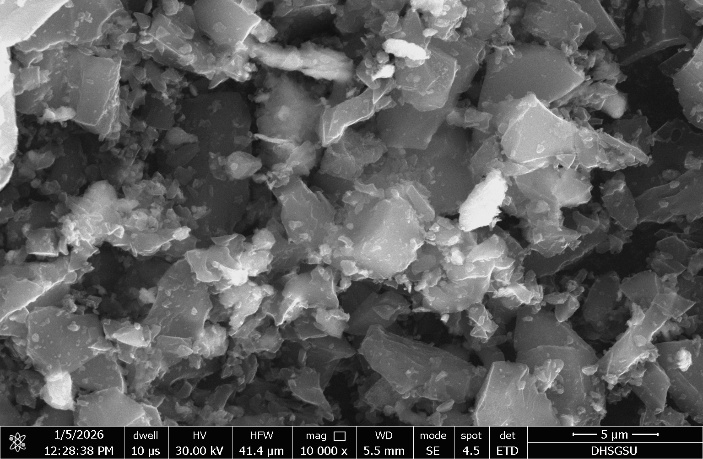

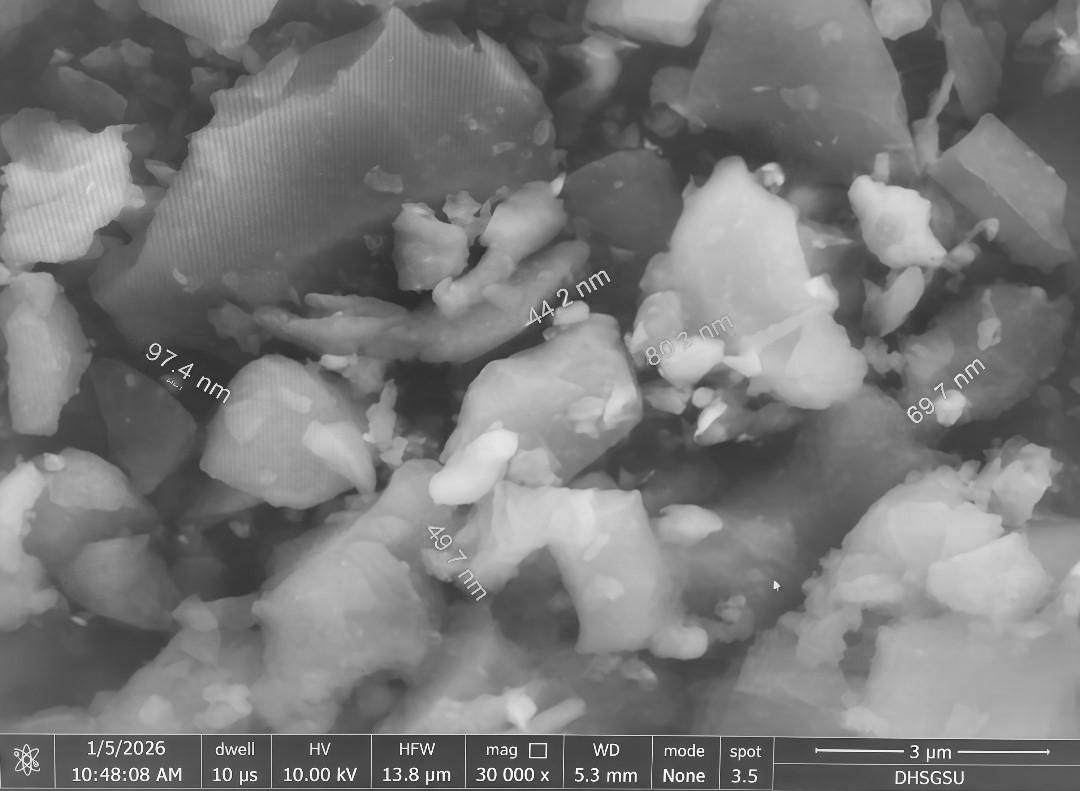


**Figure 5.** Synthesized nanobiochar micrographs taken using a scanning electron microscope (SEM) at various magnifications.

| 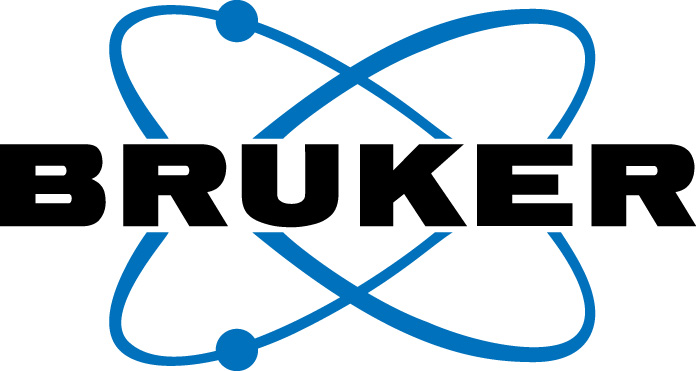 |
| --- |

**Application Note**

Company / Department

**Figure 6.** The spatial distribution of the elements C, O, and Fe is displayed in EDS elemental mapping images.

| 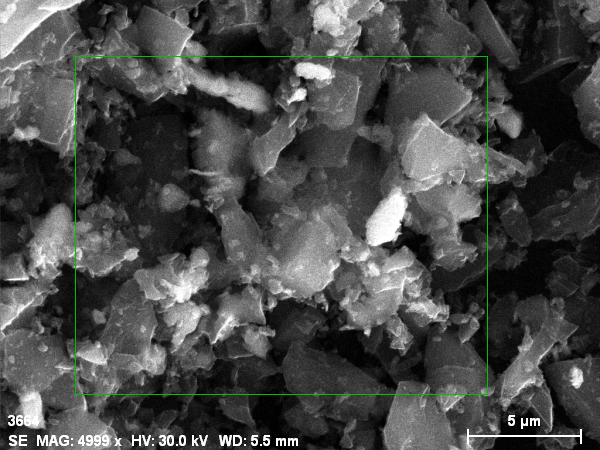 | |
| --- | --- |
| 3664Date:1/5/2026 1:19:46 PMImage size:1024 x 768Mag:4999.4111969112xHV:30.0kV | |

| Map data 1829Date:1/5/2026 1:20:03 PMImage size:704 x 578Mag:4999.4111969112xHV:30.0kV | |
| --- | --- |
| 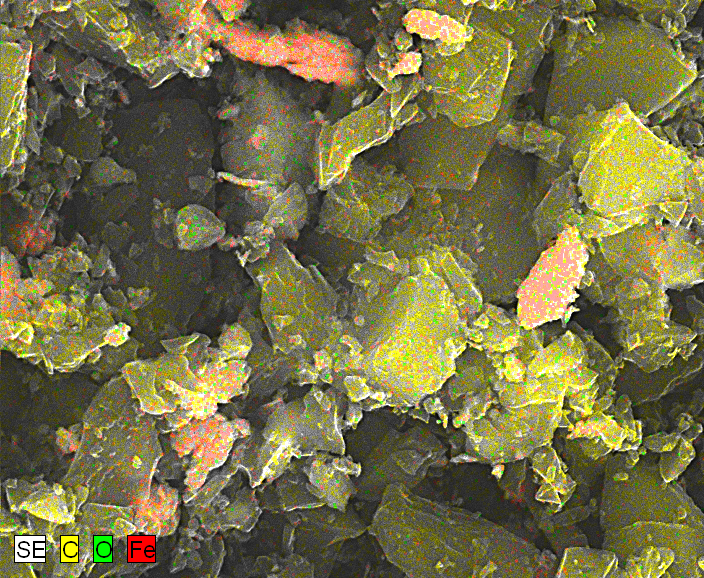 | |
|  | |
|  | |


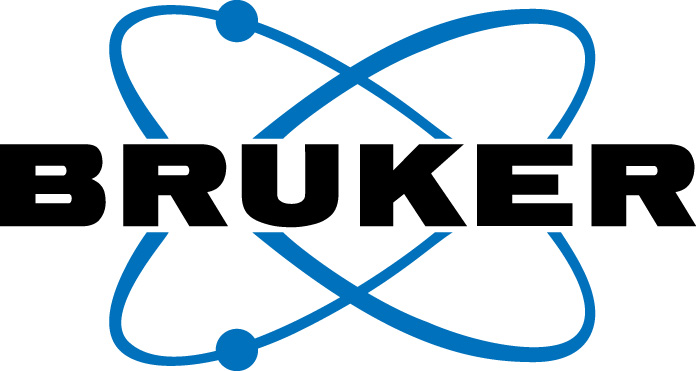


|  |
| --- |

| 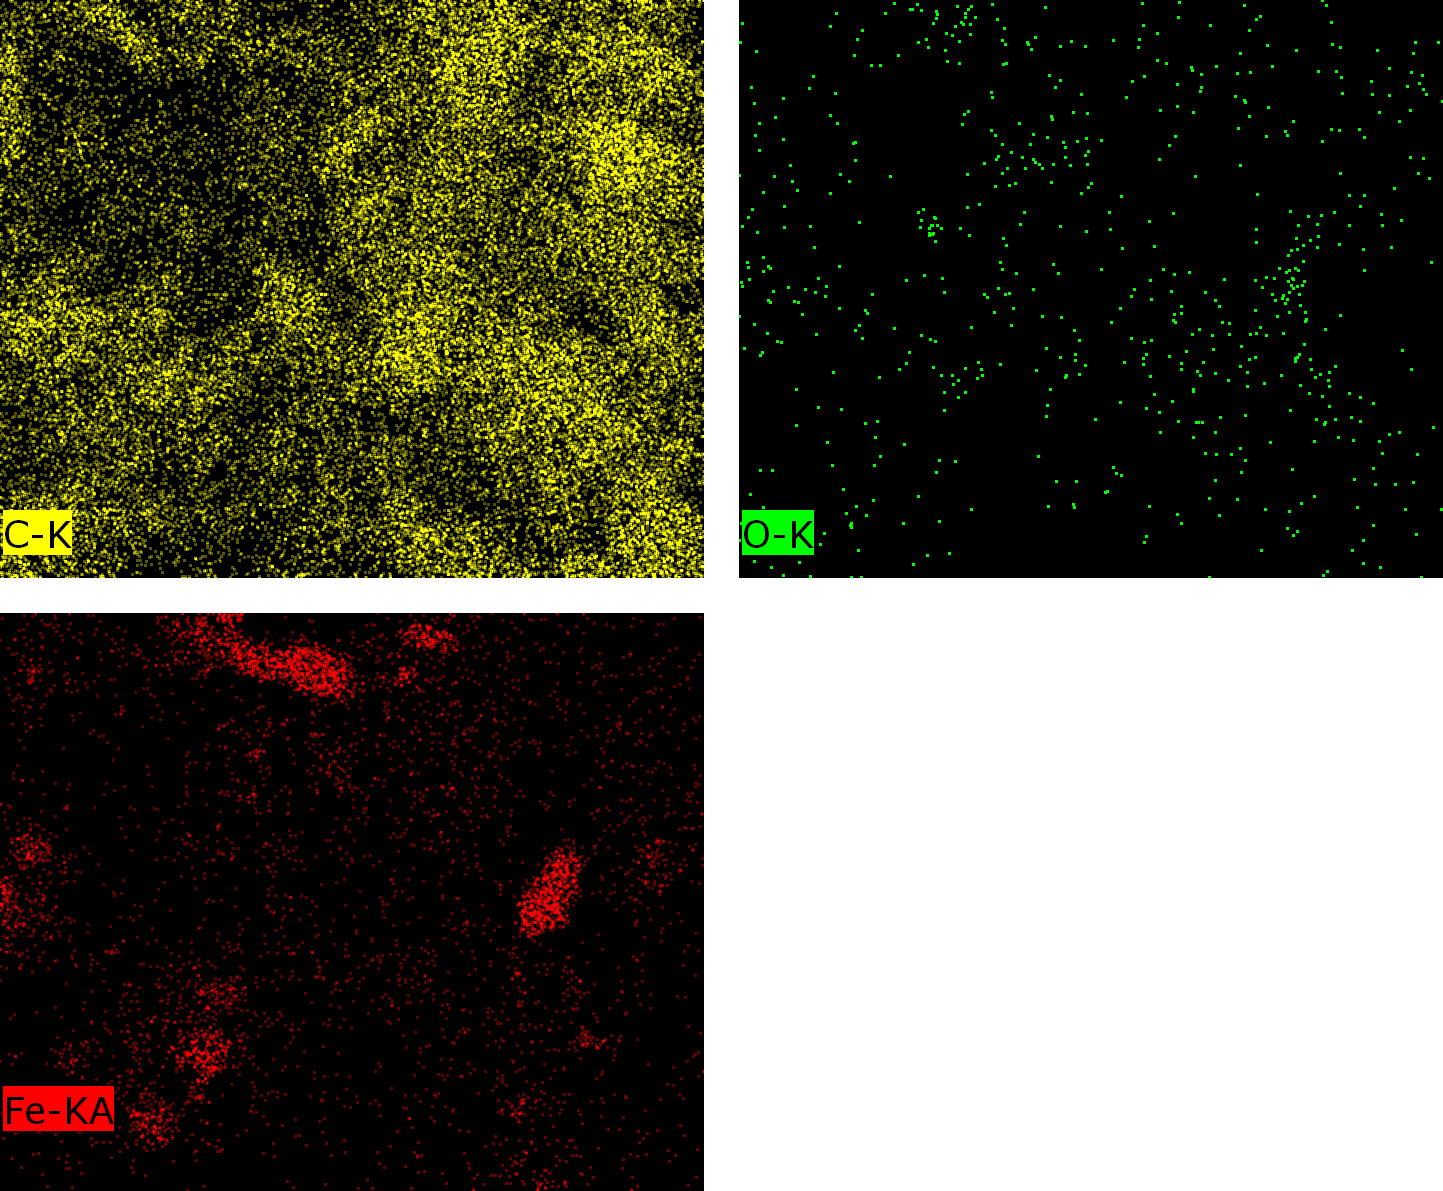 | |
| --- | --- |
| C-K, O-K, Fe-KADate:1/5/2026 1:24:13 PM  Image size:704 x 578  Mag:4999.4111969112x  HV:30.0kV | |


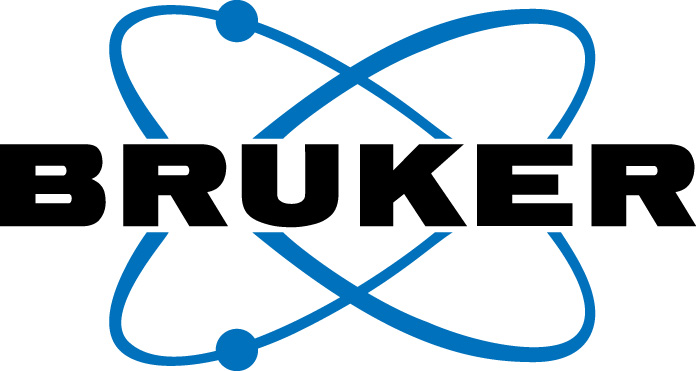


| El AN Series unn. C norm. C Atom. C Error (1 Sigma)  [wt.%] [wt.%] [at.%] [wt.%]  -----------------------------------------------------  C 6 K-series 87.49 87.49 92.58 10.24  O 8 K-series 8.07 8.07 6.41 1.96  Fe 26 K-series 4.45 4.45 1.01 0.15  -----------------------------------------------------  Total: 100.00 100.00 100.00 | |
| --- | --- |
|  | |

|  |
| --- |

**Figure 7**. EDS spectrum that shows the synthetic material's elemental composition.

| 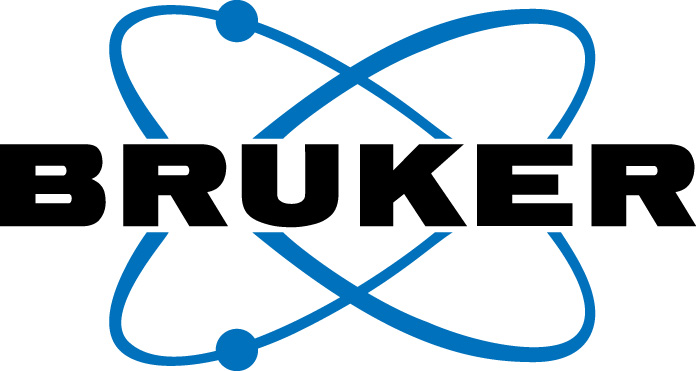 |
| --- |

|  | |
| --- | --- |
| El AN Series unn. C norm. C Atom. C Error (1 Sigma)  [wt.%] [wt.%] [at.%] [wt.%]  -----------------------------------------------------  C 6 K-series 86.31 86.31 92.41 10.12  O 8 K-series 6.69 6.69 5.38 1.63  Fe 26 K-series 4.35 4.35 1.00 0.15  Na 11 K-series 1.00 1.00 0.56 0.10  Si 14 K-series 0.74 0.74 0.34 0.06  Ca 20 K-series 0.49 0.49 0.16 0.04  Cl 17 K-series 0.42 0.42 0.15 0.04  -----------------------------------------------------  Total: 100.00 100.00 100.00 | |

**Figure 4.** N₂ adsorption–desorption isotherm of teak wood–derived nano-biochar synthesized at 800-900 °C


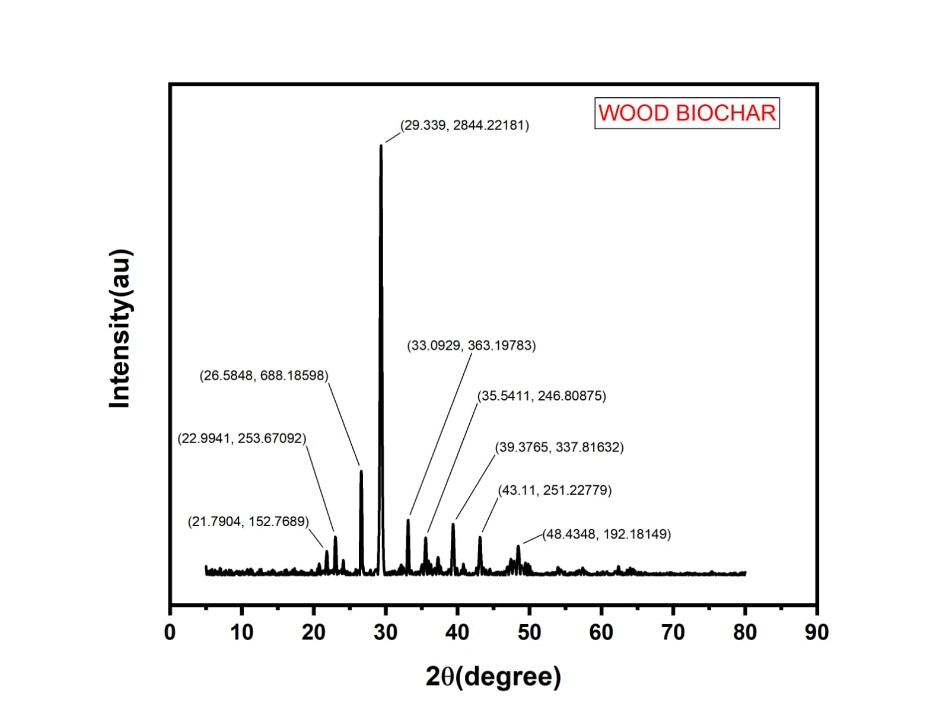


**Figure 8.** X-ray diffraction (XRD) pattern of Nanobiochar made from teak wood, displaying


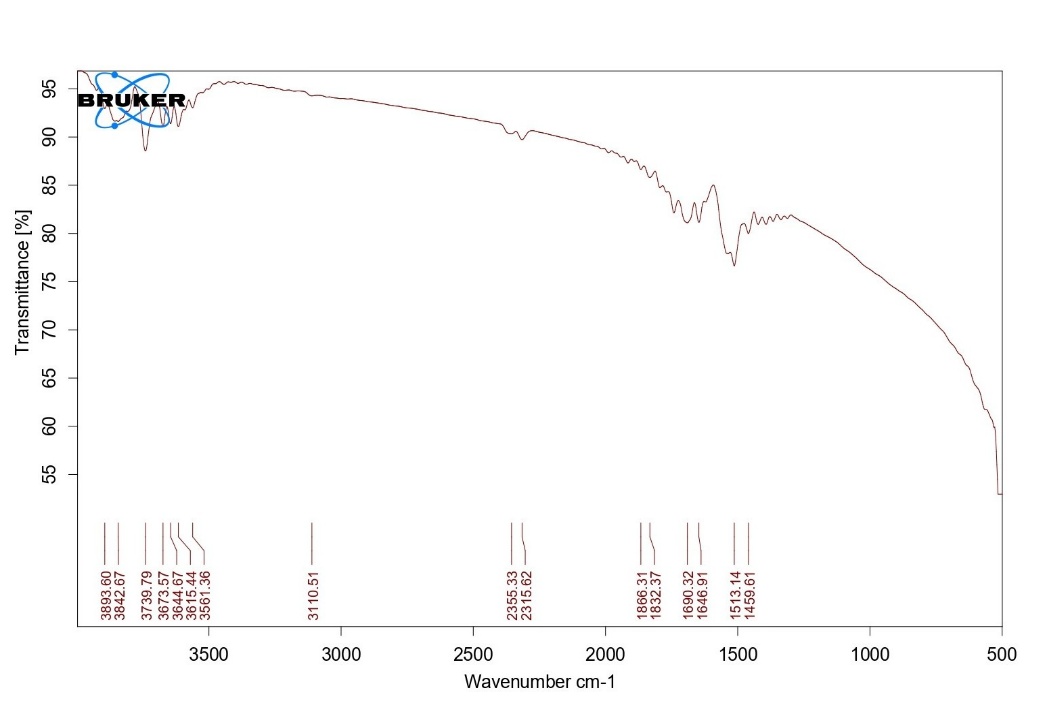


**Figure 9.** FTIR measurement of the produced biochar/nanobiochar sample

**
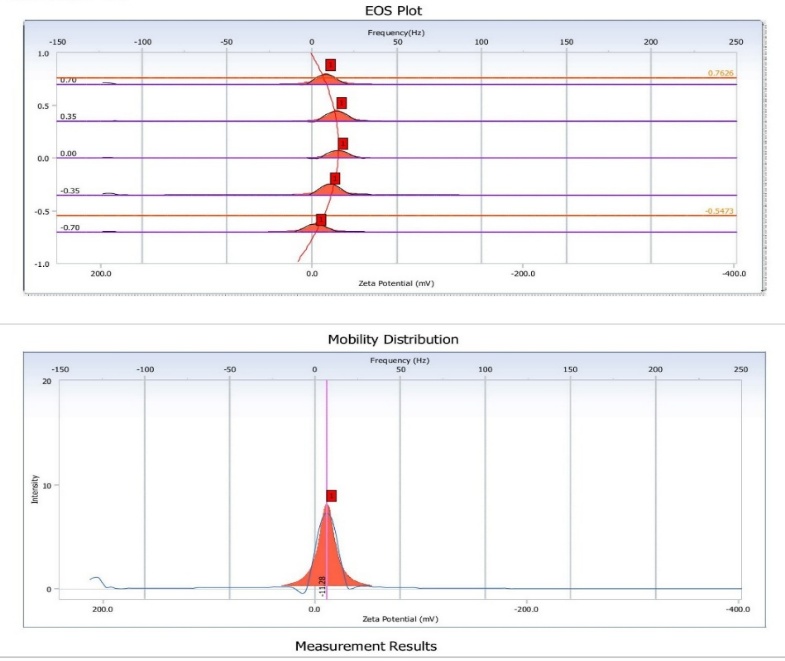
**

**Figure 10**. The measurement data, zeta potential distribution, and electrophoretic mobility map of the generated material.

**
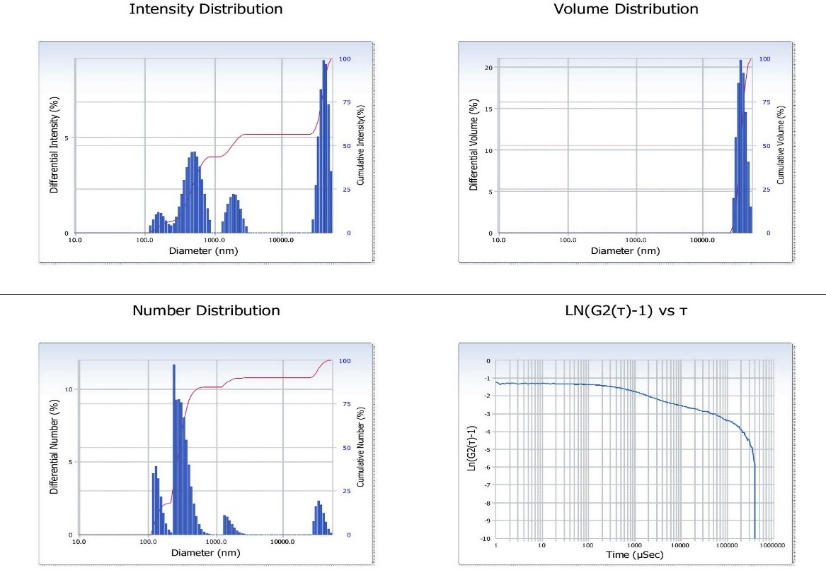
**

**Figure 11.** Particle size distribution analysis of the synthesized material.
